# Supplementary material
Source: publisher site journal article supplement (https://www.dovepress.com/article/486258)
Supplement: Supplementary file 1 [file get_supplementary_file.php]

This questionnaire is used solely to survey nurses' knowledge, beliefs, and behaviors related to laboratory testing, and will not disclose any personal information. Please feel free to fill it out.

| **General Information Hospital Level** | Department | Gender | Age | Years of Experience | Education Level | Job Title | Position | Hierarchy |
| --- | --- | --- | --- | --- | --- | --- | --- | --- |

Venous Blood Specimen Collection Knowledge, Beliefs, and Behaviors Questionnaire Scoring Instructions: For single choice and multiple choice, correct answers receive 1 point, incorrect answers receive 0 points.

Knowledge Section

For venous blood collection, the appropriate vein should be selected, and the tourniquet should be tied approximately (D) cm above the puncture site (proximal).

A. 4-5 cm B. 5-6 cm C. 6-8 cm D. 5-7.5 cm

When performing venous blood collection, the disinfection range should have a diameter of (B).

A. 3-5 cm B. Greater than 5 cm C. 4-5 cm D. 5-6 cm

The needle insertion angle during venous blood collection should be (C).

A. 10-20° B. 20-30° C. 15-30° D. 30-45°

During blood collection, the tourniquet should be tied for the shortest time possible, and the tourniquet pressure should not exceed (C).

A. 30 B. 40 C. 60 D. 90

For venous blood collection, fasting should be at least (A) hours but should not exceed (C).

A. 4, 12 B. 4, 8 C. 8, 16 D. 6, 12

Parenteral nutrition emulsions should be infused and blood collection performed (B) hours after stopping the infusion.

A. 6 B. 8 C. 10 D. 12

When multiple blood samples are collected, the order should be (A):

1. Blood culture/Blue-Black/Yellow-Red/Green/Purple/Gray
2. Blue-Black/Blood culture/Yellow-Red/Green/Purple/Gray
3. Blue-Black/Blood culture/Yellow-Red/Purple/Green/Gray

D. Blood culture/Blue-Black/Yellow-Red/Gray/Green/Purple

The correct description of specimen transport time is (D):

1. Morning urine should be sent for testing within 4 hours.
2. Angiotensin II (AII) can be stored at room temperature after collection.
3. Oral glucose tolerance test, insulin release test, and C-peptide release test should be sent immediately after each collection; there is no need to wait until all five samples are collected.

D. Stool specimens should be sent promptly for testing, generally within 1 hour of collection.

Items requiring fasting for collection include: (BCD) A. Blood cell analysis B. Blood lipids C. Glucose metabolism D. Blood rheology

The correct statement regarding venous blood collection is (ABCD):

1. When blood is collected from a venous catheter for coagulation tests, discard the first 5 ml or 6 times the volume of the catheter, and for other tests, discard the first 2 times the volume of the catheter.
2. Insert the needle first, then insert the catheter to prevent negative pressure loss; after drawing blood, remove the test tube first, then remove the needle.
3. If the patient is receiving venous infusion or blood transfusion, blood collection should not be performed on the same arm; after breast surgery or in patients with arteriovenous fistula, blood should be collected from the opposite arm.

D. When using a butterfly needle and only collecting citrate-anticoagulated specimens, discard the first tube. The discarded tube is used to prefill the collection system tubing, without needing to fill completely.

The correct statements regarding special testing items and the effects of food and drugs on specimens are (AB):

1. OGTT: Dissolve 75g anhydrous glucose (equivalent to 82.5g hydrated glucose) in 300ml of warm water and drink it within 5 minutes. The timing starts when the first glucose dose is ingested, and blood samples should be taken at 30 minutes, 1 hour, 2 hours, and 3 hours.
2. For occult blood tests, patients should be instructed to eat a vegetarian diet for 3 days before specimen collection and avoid taking vitamin C, iron supplements, bismuth drugs, and animal blood, as well as green leafy vegetables.
3. Insulin-treated patients can undergo normal glucose tolerance and insulin release tests

D. Patients receiving intravenous infusion of recombinant human brain natriuretic peptide can undergo BNP testing.

The correct statements regarding blood culture specimen collection are (CD):

1. If a butterfly needle is used for blood culture, it is recommended to inoculate the anaerobic bottle first, then the aerobic bottle; if a syringe is used, the aerobic bottle should be inoculated first, then the anaerobic bottle.
2. If the blood volume is insufficient, prioritize inoculating the anaerobic bottle, then place the remaining blood in the aerobic bottle.
3. Blood should be collected from intermittent febrile patients during the fever peak or just before the next dose of antibiotics if they have already been treated with antibiotics.

D. Skin disinfection should first be performed with 75% alcohol for 30 seconds, then with Mocon iodine for 1 minute, followed by another 30 seconds of alcohol disinfection.

| **Attitude Section Scoring Instructions: Strongly Agree 5 points, Agree 4 points, Neutral 3 points, Disagree 2 points, Strongly Disagree 1 point.** | | | | |
| --- | --- | --- | --- | --- |
|  |  |  |  |  |
| I believe that incorrect blood specimen collection by nurses affects the judgment of the patient's condition. Strongly Agree | Agree | Neutral | Disagree | Strongly Disagree |
| I believe that nurses mastering venous blood collection knowledge can reduce specimen failure rates. Strongly Agree | Agree | Neutral | Disagree | Strongly Disagree |
| I believe that nurses should participate in training on venous blood collection guidelines. Strongly Agree | Agree | Neutral | Disagree | Strongly Disagree |
| I believe I can correctly educate patients before blood specimen collection. Strongly Agree | Agree | Neutral | Disagree | Strongly Disagree |
| I am proficient in the precautions for collecting various types of specimens. Strongly Agree | Agree | Neutral | Disagree | Strongly Disagree |
| I strictly follow venous blood specimen collection guidelines during specimen collection. Strongly Agree | Agree | Neutral | Disagree | Strongly Disagree |
| When a patient’s blood specimen is disqualified, I carefully analyze which step caused the issue (patient factors, doctor's orders, collection process, transport issues, etc.). Strongly Agree | Agree | Neutral | Disagree | Strongly Disagree |
|  |  |  |  |  |
| **Behavior Section Scoring Instructions: (1-6, 8-9) Never 1 point, Occasionally 2 points, Sometimes 3 points, Often 4 points, Always 5 points; For question 7, reverse scoring: Never 5 points, Occasionally 4 points, Sometimes 3 points, Often 2 points, Always 1 point.** | | | | |
|  |  |  |  |  |
| I actively learn about venous blood collection knowledge during work. Never | Occasionally | Sometimes | Often | Always |
| For tests with special requirements regarding diet, exercise, timing, posture, medication, etc., I know the collection method and confirm if the patient is prepared accordingly. Never | Occasionally | Sometimes | Often | Always |
| I know the tube label requirements and can apply them correctly every time. Never | Occasionally | Sometimes | Often | Always |
| Before, during, and after specimen collection, I strictly follow the verification system to check patient information and test tubes. Never | Occasionally | Sometimes | Often | Always |
| When collecting blood culture specimens, I strictly follow disinfection guidelines to avoid contamination. Never | Occasionally | Sometimes | Often | Always |
| Each time I collect blood, I ensure the collected volume meets the required tube capacity. Never | Occasionally | Sometimes | Often | Always |
| When the blood volume is insufficient, I use a syringe to aspirate the test tube to increase the negative pressure. Never | Occasionally | Sometimes | Often | Always |
| For tubes containing anticoagulants, I immediately gently invert them after each collection, ensuring the mixing times follow the tube’s requirements. Never | Occasionally | Sometimes | Often | Always |
| I ensure that different specimens are sent for testing on time as required. Never | Occasionally | Sometimes | Often | Always |

Nurses' Standardization of Operations Questionnaire

Target Respondents

Clinical nurses responsible for venous blood collection, specimen preparation, and transportation in the hospital.

Rating Scale

1 = Never

2 = Rarely

3 = Sometimes

4 = Often

5 = Always

A. Verification and Preparation (Identity Confirmation, Container Selection)

1. I always use at least two valid methods (e.g., wristband, name, bed number) to verify patient identity before blood collection.

* Rating: [ 1 ] [ 2 ] [ 3 ] [ 4 ] [ 5 ]

2. I can correctly select blood collection tubes (color, anticoagulant type) according to hospital SOPs for different test requirements.

* Rating: [ 1 ] [ 2 ] [ 3 ] [ 4 ] [ 5 ]

3. I explain the examination purpose, potential discomfort, and precautions to patients before blood collection.

* Rating: [ 1 ] [ 2 ] [ 3 ] [ 4 ] [ 5 ]

4. For special specimens like blood cultures, I strictly follow aseptic requirements (e.g., proper alcohol + iodophor disinfection sequence).

* Rating: [ 1 ] [ 2 ] [ 3 ] [ 4 ] [ 5 ]

B. Operational Procedures (Standardized Collection, Mixing, Transportation)

5. I properly control tourniquet tension and duration, and pay attention to blood collection sequence to avoid hemolysis or cross-contamination.

* Rating: [ 1 ] [ 2 ] [ 3 ] [ 4 ] [ 5 ]

6. I promptly and thoroughly mix tubes containing anticoagulants to prevent specimen coagulation or microclot formation.

* Rating: [ 1 ] [ 2 ] [ 3 ] [ 4 ] [ 5 ]

7. I correctly dispose of needles and supplies and maintain safety protection after each blood collection.

* Rating: [ 1 ] [ 2 ] [ 3 ] [ 4 ] [ 5 ]

8. When encountering insufficient blood volume or operational abnormalities, I immediately take remedial actions or recollect according to hospital requirements.

* Rating: [ 1 ] [ 2 ] [ 3 ] [ 4 ] [ 5 ]

C. Quality Monitoring (Error Reporting, Continuous Improvement)

9. I actively complete reports and seek guidance for non-compliant specimens (container mismatch, blood culture contamination, specimen coagulation).

* Rating: [ 1 ] [ 2 ] [ 3 ] [ 4 ] [ 5 ]

10. I understand and utilize the hospital's non-punitive reporting and feedback mechanism for self-improvement.

* Rating: [ 1 ] [ 2 ] [ 3 ] [ 4 ] [ 5 ]

11. I actively participate in regular departmental or hospital quality improvement meetings and adjust my operations based on feedback.

* Rating: [ 1 ] [ 2 ] [ 3 ] [ 4 ] [ 5 ]

D. Information Technology and Process Integration

12. I am proficient in using information systems (e.g., patient barcode scanning, automatic error interception, specimen abnormality alerts) to improve collection accuracy.

* Rating: [ 1 ] [ 2 ] [ 3 ] [ 4 ] [ 5 ]

13. I promptly communicate with the laboratory or transportation team when encountering delays or barcode inconsistencies during specimen handover.

* Rating: [ 1 ] [ 2 ] [ 3 ] [ 4 ] [ 5 ]

14. I promptly check and handle real-time alerts and reminders from the pre-analytical quality management information system.

* Rating: [ 1 ] [ 2 ] [ 3 ] [ 4 ] [ 5 ]

E. Overall Assessment

15. After training, I am very familiar with the hospital's new SOPs and standards and can complete blood collection and related operations as required.

* Rating: [ 1 ] [ 2 ] [ 3 ] [ 4 ] [ 5 ]

Total Score: ____ / 75

Patient Satisfaction Questionnaire

Target Respondents

Outpatients and inpatients receiving blood or other specimen collection services at this hospital.

Rating Scale

1 = Very Dissatisfied

2 = Dissatisfied

3 = Neutral

4 = Satisfied

5 = Very Satisfied

A. Blood Collection Communication

1. Nurses clearly explain the purpose and precautions of blood collection, helping me understand the importance of testing.

* Rating: [ 1 ] [ 2 ] [ 3 ] [ 4 ] [ 5 ]

2. I am satisfied with the thoroughness of personal identity verification before blood collection.

* Rating: [ 1 ] [ 2 ] [ 3 ] [ 4 ] [ 5 ]

B. Nursing Operation and Safety

3. The nurse's movements are skilled and gentle, minimizing discomfort.

* Rating: [ 1 ] [ 2 ] [ 3 ] [ 4 ] [ 5 ]

4. The nurse follows standard procedures for disinfection, tourniquet use, and tube changes.

* Rating: [ 1 ] [ 2 ] [ 3 ] [ 4 ] [ 5 ]

5. The nurse properly mixes anticoagulant tubes and explains operational details, making me confident in specimen quality.

* Rating: [ 1 ] [ 2 ] [ 3 ] [ 4 ] [ 5 ]

C. Waiting Time and Process

6. The waiting time at the blood collection area (or ward) is acceptable.

* Rating: [ 1 ] [ 2 ] [ 3 ] [ 4 ] [ 5 ]

7. Nurses promptly send specimens for testing, avoiding multiple trips or waiting for tube collection.

* Rating: [ 1 ] [ 2 ] [ 3 ] [ 4 ] [ 5 ]

8. When specimen abnormalities require recollection, the hospital's communication and arrangements are timely and reasonable.

* Rating: [ 1 ] [ 2 ] [ 3 ] [ 4 ] [ 5 ]

D. Comfort and Environment

9. The blood collection area (seating, hygiene, safety protection) is clean, orderly, and relatively safe.

* Rating: [ 1 ] [ 2 ] [ 3 ] [ 4 ] [ 5 ]

10. The nurse's attitude and communication help ease my anxiety during blood collection.

* Rating: [ 1 ] [ 2 ] [ 3 ] [ 4 ] [ 5 ]

E. Overall Experience

11. The entire blood collection process is smooth and reassuring, and I approve of the hospital's nursing standards.

* Rating: [ 1 ] [ 2 ] [ 3 ] [ 4 ] [ 5 ]

12. I would choose and trust this hospital's services for future blood tests or examinations.

* Rating: [ 1 ] [ 2 ] [ 3 ] [ 4 ] [ 5 ]

Total Score: ____ / 60

Clinical Doctors' Trust in Test Results Questionnaire

Target Respondents

Clinical department doctors who regularly collaborate with the hospital laboratory.

Rating Scale

1 = Strongly Disagree

2 = Disagree

3 = Uncertain

4 = Agree

5 = Strongly Agree

A. Specimen Quality and Pre-analytical Phase

1. I believe the newly established pre-analytical quality management measures significantly reduce the occurrence of unqualified specimens.

* Rating: [ 1 ] [ 2 ] [ 3 ] [ 4 ] [ 5 ]

2. I trust the nursing team's compliance with container type, collection volume, and disinfection standards.

* Rating: [ 1 ] [ 2 ] [ 3 ] [ 4 ] [ 5 ]

3. Communication between the laboratory and clinical departments is timely and clear when specimens show contamination or insufficient volume.

* Rating: [ 1 ] [ 2 ] [ 3 ] [ 4 ] [ 5 ]

B. Test Result Accuracy and Timeliness

4. Key indicators like blood culture contamination rates have decreased, indirectly reflecting higher result reliability.

* Rating: [ 1 ] [ 2 ] [ 3 ] [ 4 ] [ 5 ]

5. Laboratory reports are provided within expected timeframes, and I am satisfied with result timeliness.

* Rating: [ 1 ] [ 2 ] [ 3 ] [ 4 ] [ 5 ]

6. The laboratory promptly notifies me or my team of abnormal results for clinical decision-making.

* Rating: [ 1 ] [ 2 ] [ 3 ] [ 4 ] [ 5 ]

C. Information Technology and Feedback

7. The quality management information system provides timely information about specimen collection, transport, and analysis phases.

* Rating: [ 1 ] [ 2 ] [ 3 ] [ 4 ] [ 5 ]

8. I can quickly contact laboratory and nursing staff through the system or phone during emergencies.

* Rating: [ 1 ] [ 2 ] [ 3 ] [ 4 ] [ 5 ]

D. Overall Trust and Clinical Decision-Making

9. I endorse the hospital's "structure-process-outcome" quality management approach for ensuring test quality.

* Rating: [ 1 ] [ 2 ] [ 3 ] [ 4 ] [ 5 ]

10. I am willing to use this hospital's laboratory results as important reference for diagnosis and treatment.

* Rating: [ 1 ] [ 2 ] [ 3 ] [ 4 ] [ 5 ]

11. Based on recent experience, I have high confidence in the laboratory's standardized operations and result authenticity.

* Rating: [ 1 ] [ 2 ] [ 3 ] [ 4 ] [ 5 ]

Total Score: ____ / 55
